# Supplementary material for: Development and Properties of Valine-Alanine based Antibody-Drug Conjugates with Monomethyl Auristatin E as the Potent Payload
Source: PubMed Central journal article supplement (PMC5618509; doi:10.3390/ijms18091860), 2017-08-25
Supplement: ijms-18-01860-s001.pdf [file ijms-18-01860-s001.pdf]

# Supplementary Materials :

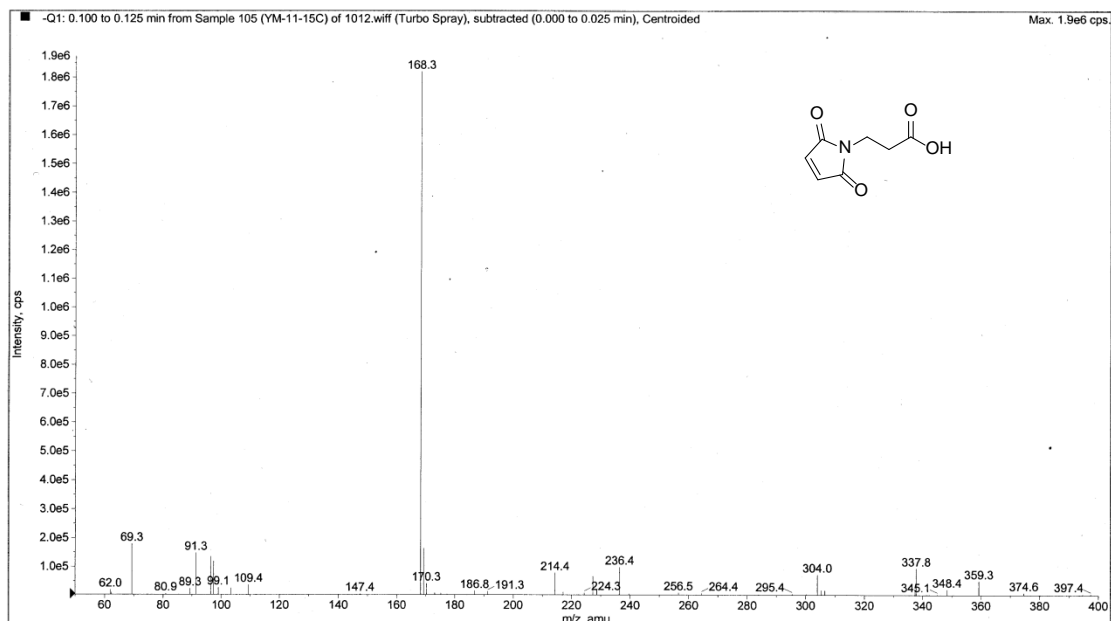

Figure S1. The ESI-MS spectrum of compound 3a.

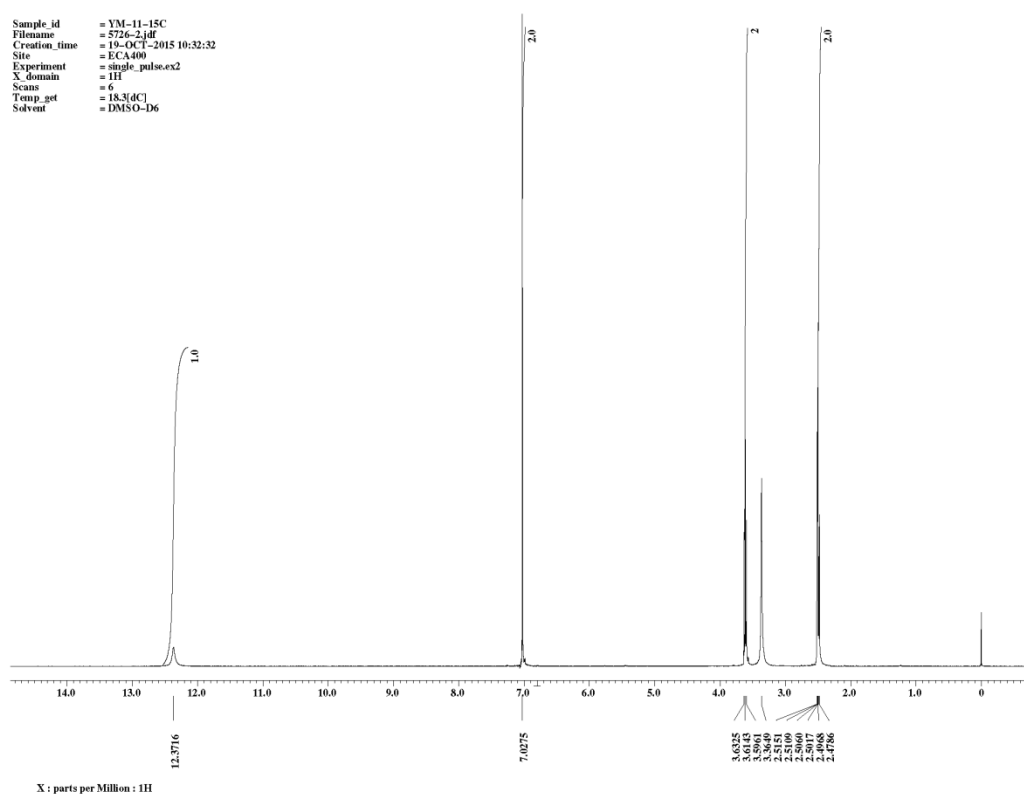

Figure S2. The <sup>1</sup>H-NMR spectrum of compound 3a.

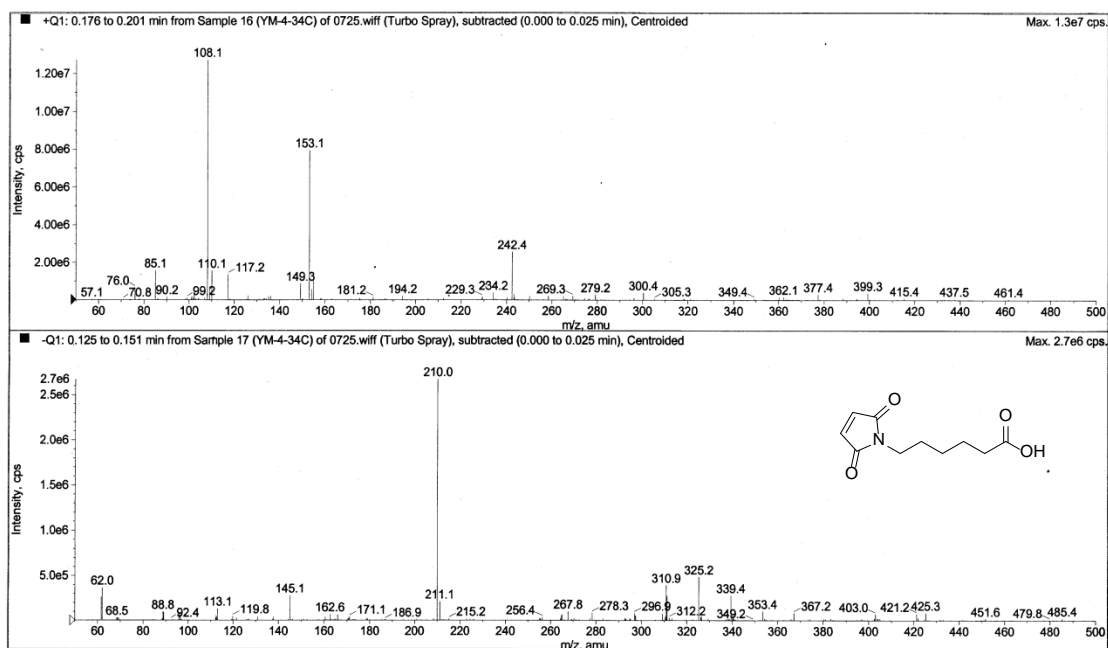

Figure S3. The ESI-MS spectrum of compound *3b*.

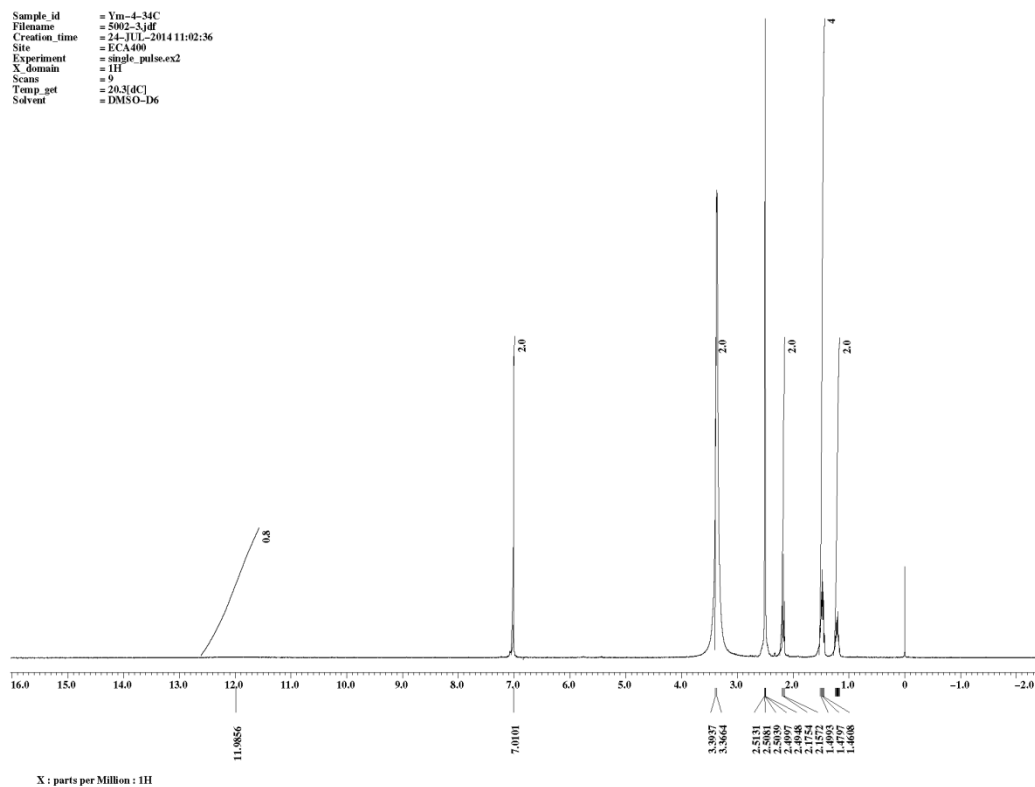

Figure S4. The  $^1\text{H}$ -NMR spectrum of compound *3b*.

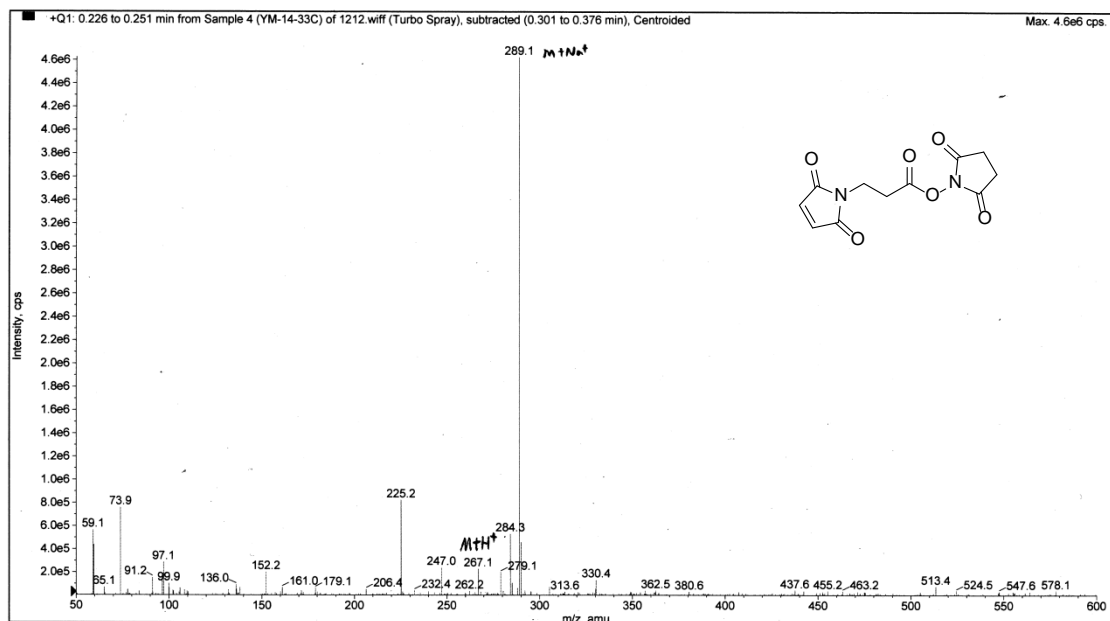

Figure S5. The ESI-MS spectrum of compound 4a.

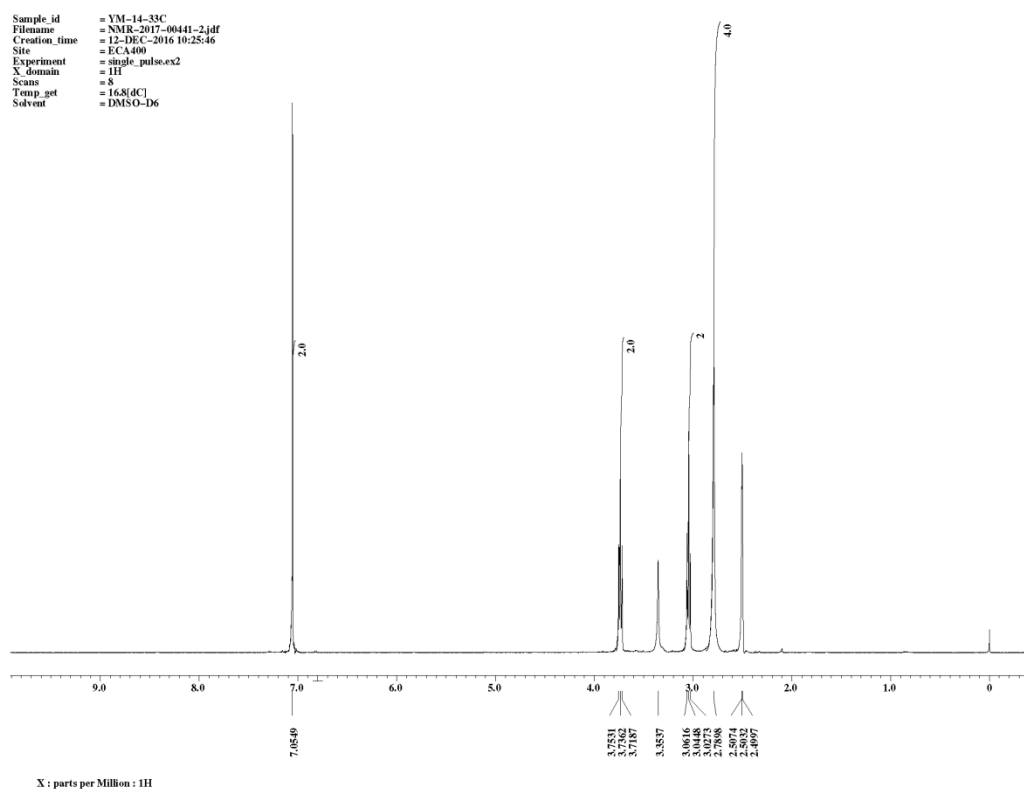

Figure S6. The <sup>1</sup>H-NMR spectrum of compound 4a.

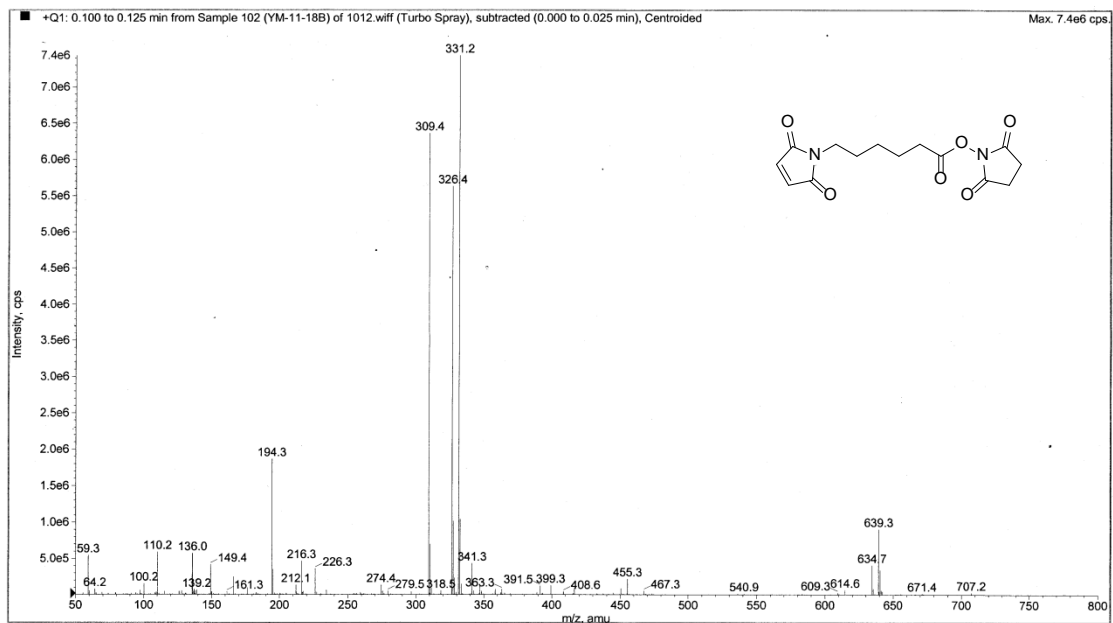

Figure S7. The ESI-MS spectrum of compound 4b.

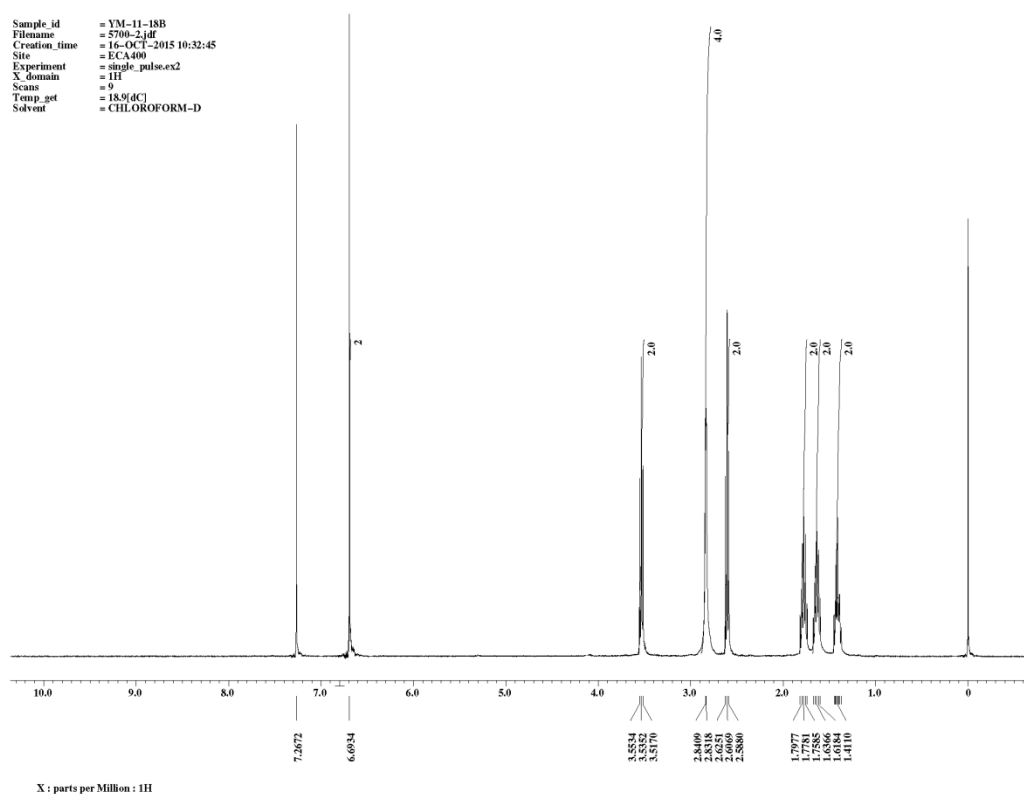

Figure S8. The <sup>1</sup>H-NMR spectrum of compound 4b.

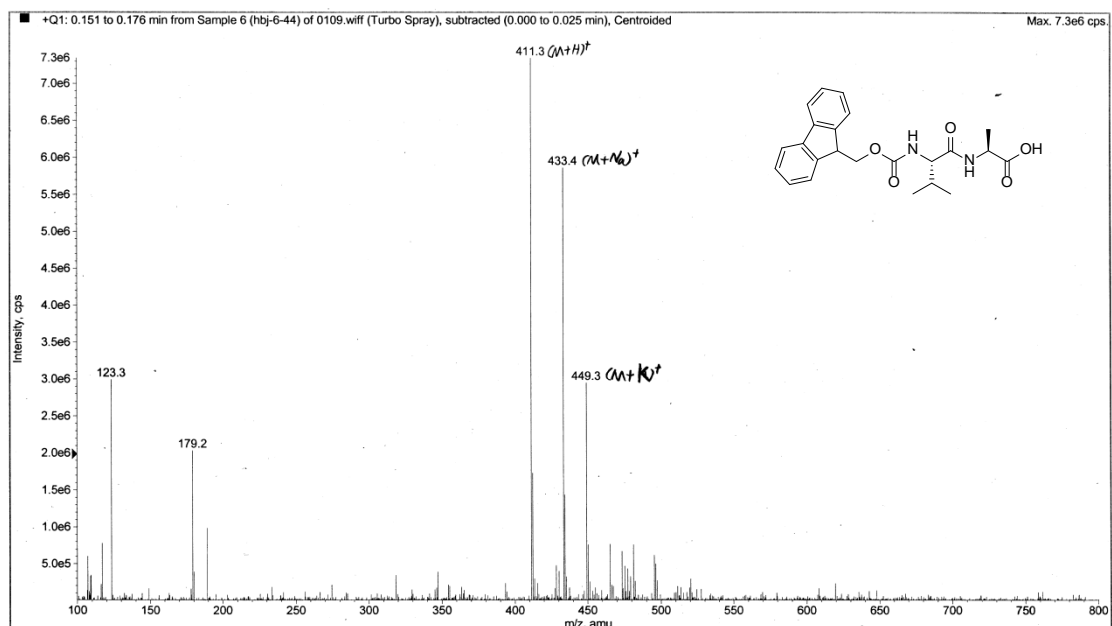

Figure S9. The ESI-MS spectrum of compound *7a*.

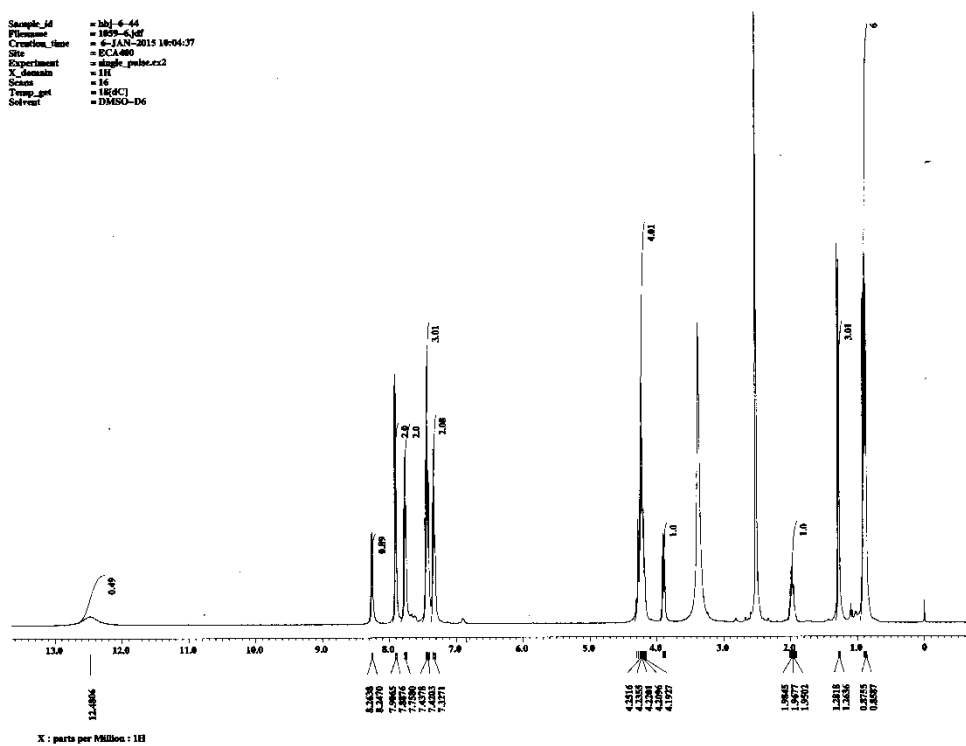

Figure S10. The <sup>1</sup>H-NMR spectrum of compound *7a*.

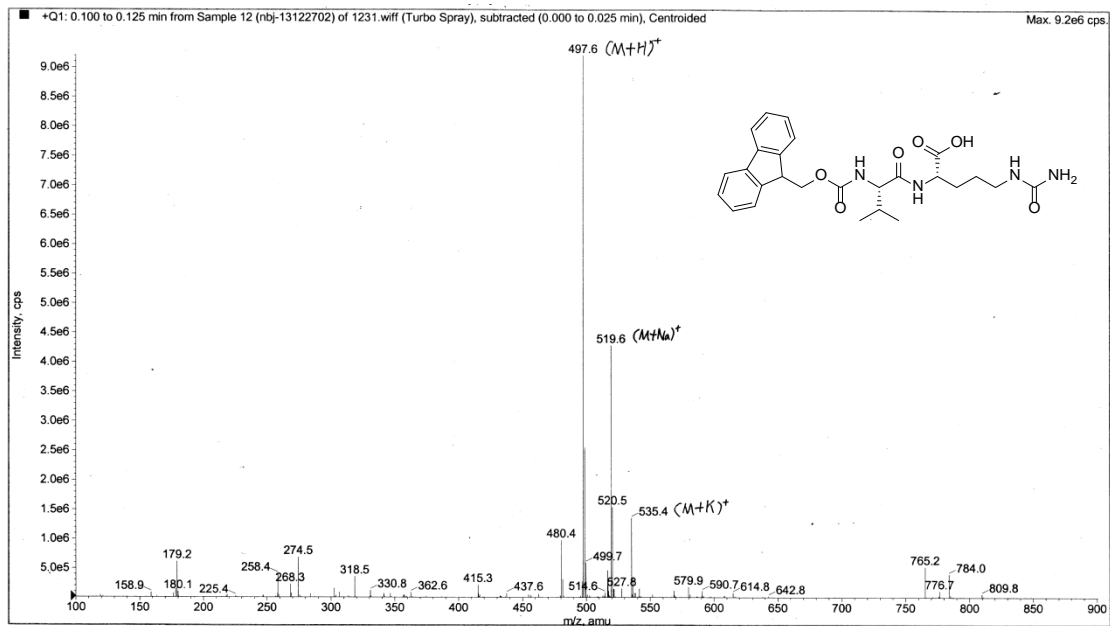

Figure S11. The ESI-MS spectrum of compound *7b*.

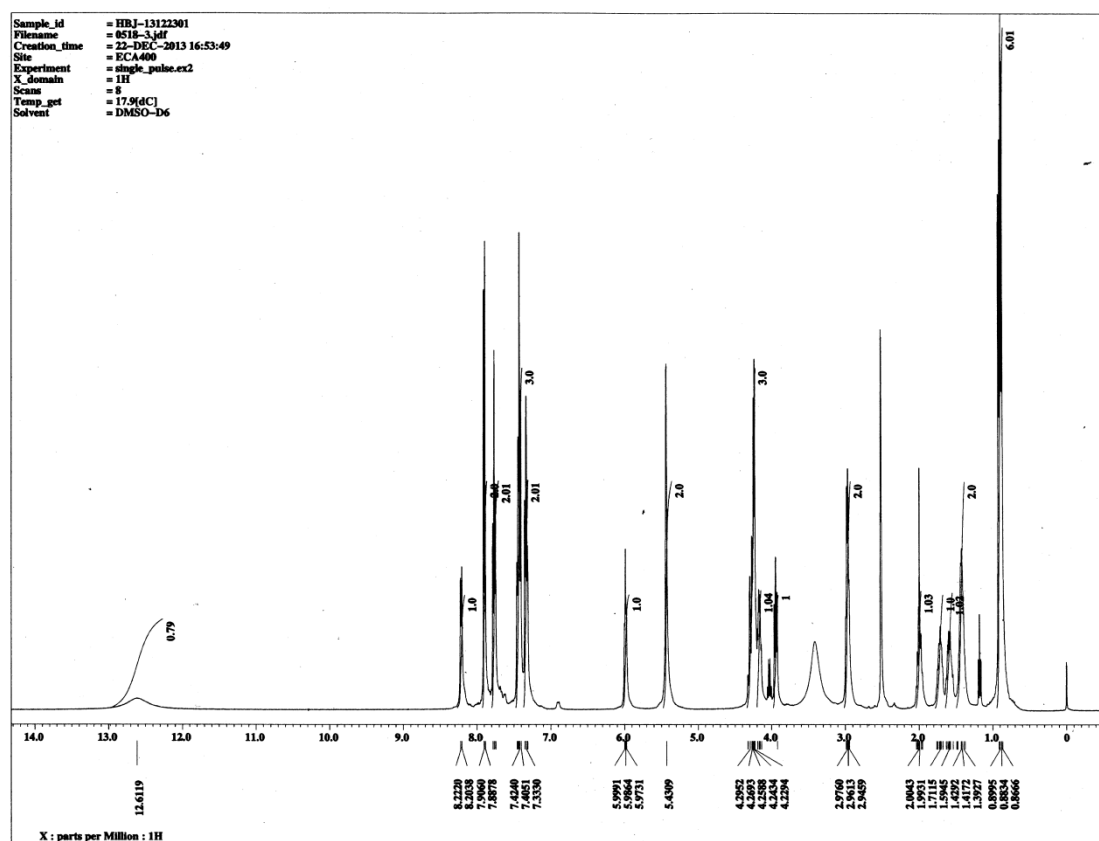

Figure S12. The <sup>1</sup>H-NMR spectrum of compound *7b*.

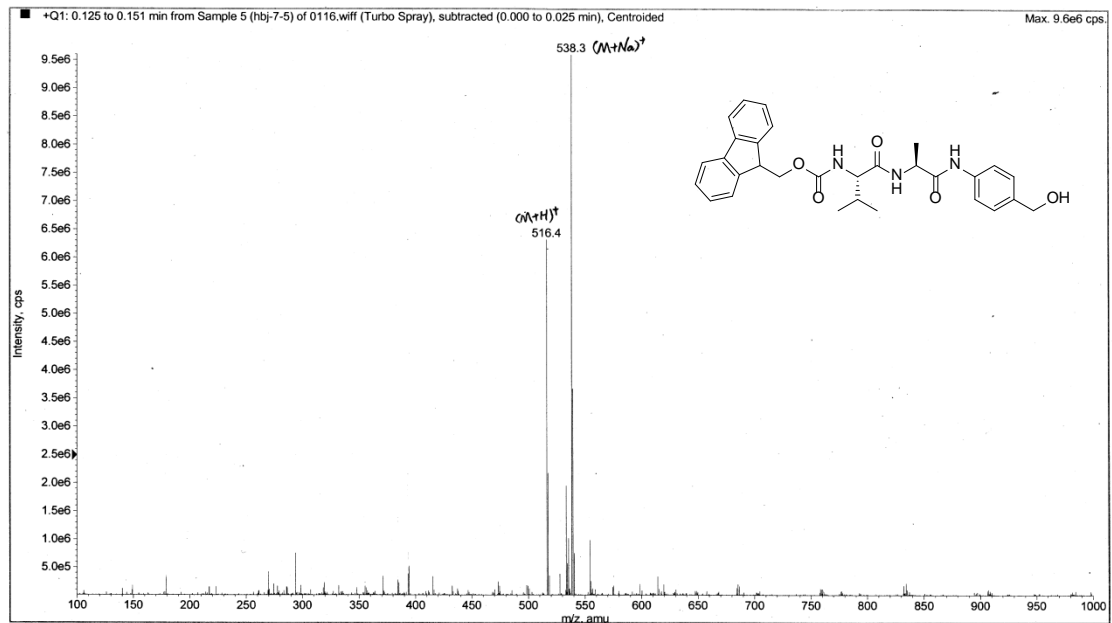

Figure S13. The ESI-MS spectrum of compound *8a*.

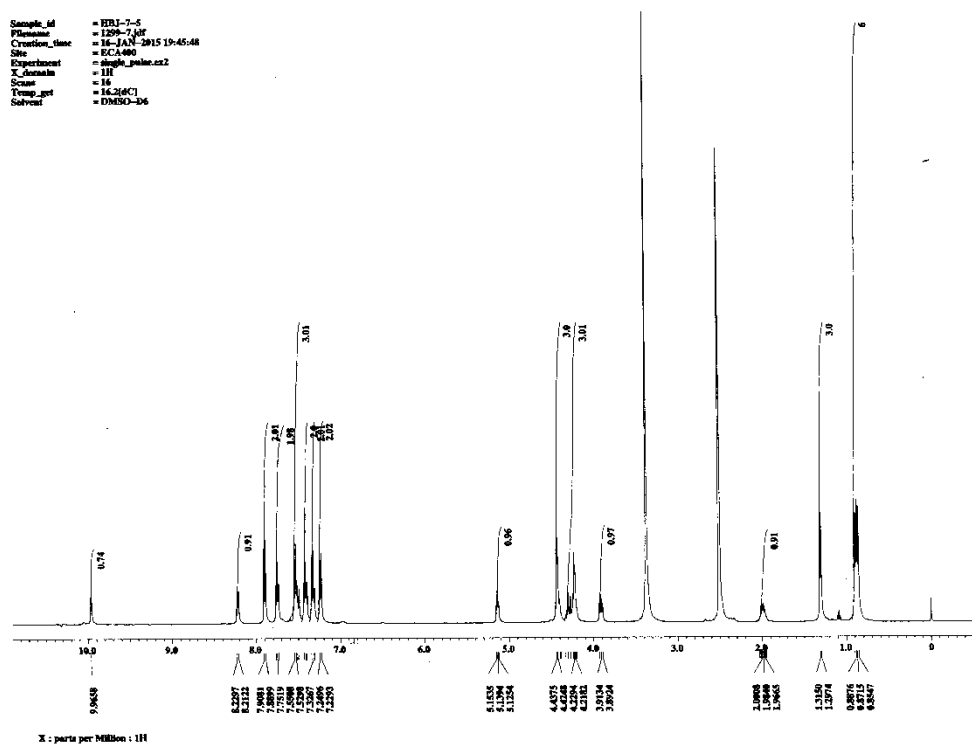

Figure S14. The  $^1\text{H}$ -NMR spectrum of compound *8a*.

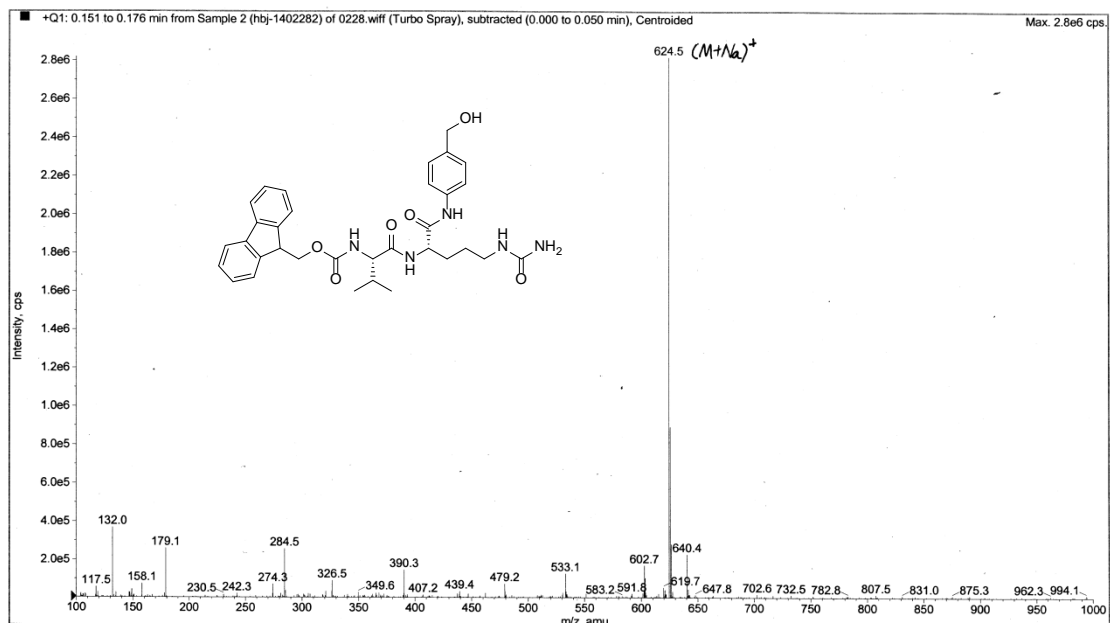

Figure S15. The ESI-MS spectrum of compound 8b.

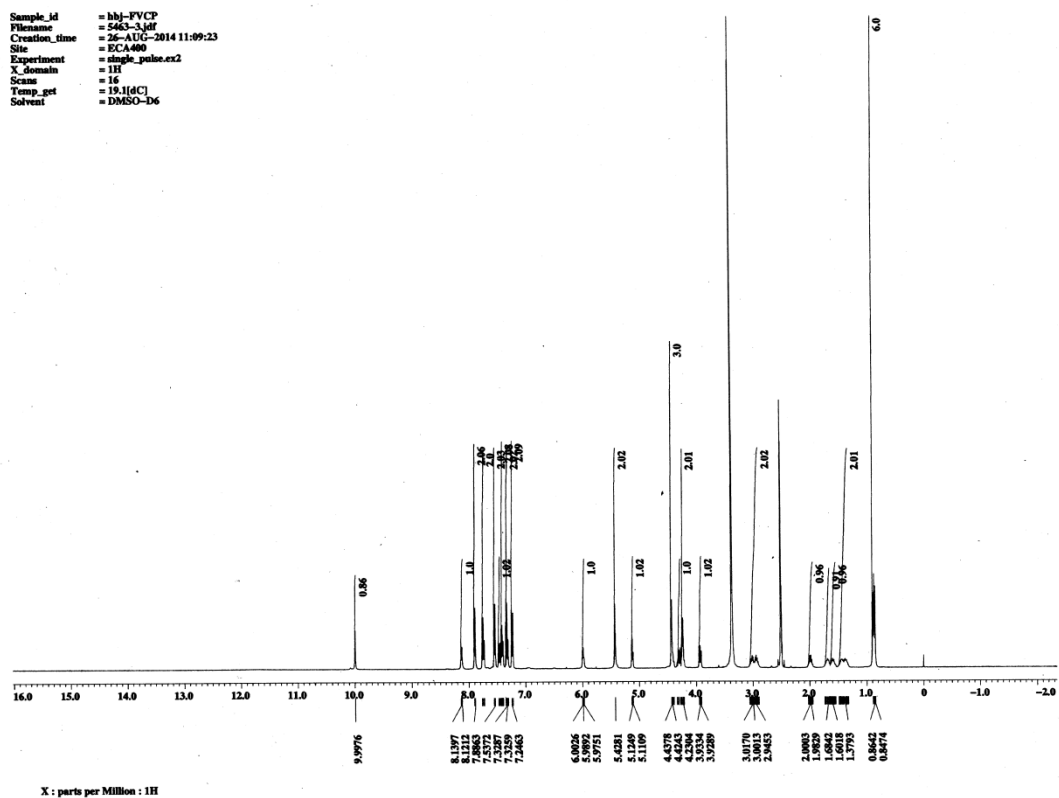

Figure S16. The <sup>1</sup>H-NMR spectrum of compound 8b.



Data Filename O850.d  
Instrument Name TOF G6230A  
Acq Method YCLM  
IRM Calibration Status Success  
User Chromatograms

Sample Name hbj-7-23  
Acquired Time 2015.02.11  
Acquired SW 6200 series TOF/6500 series

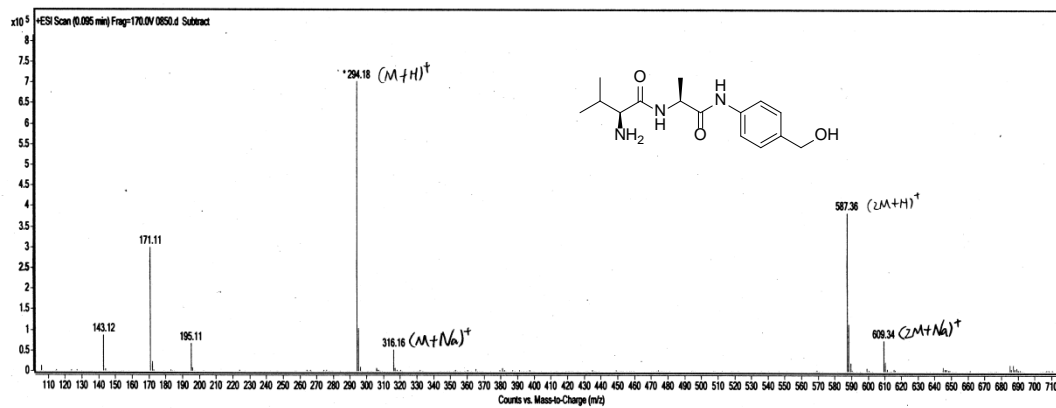

Figure S17. The ESI-MS spectrum of compound 9a.

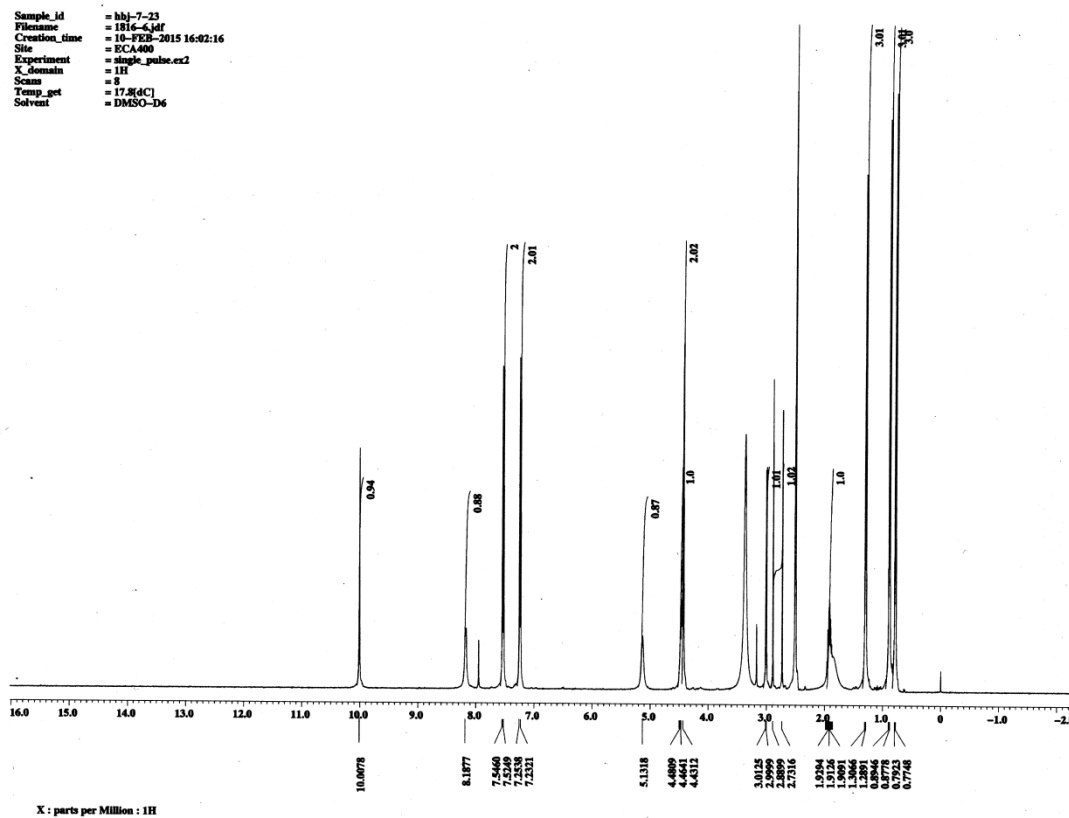

Figure S18. The <sup>1</sup>H-NMR spectrum of compound 9a.

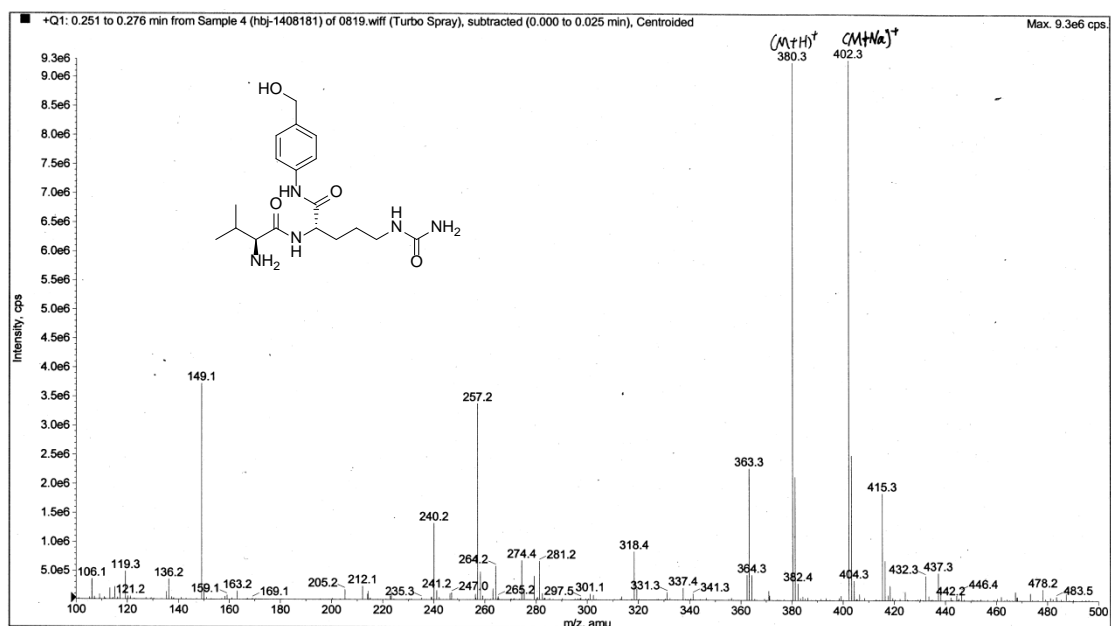

Figure S19. The ESI-MS spectrum of compound 9b.

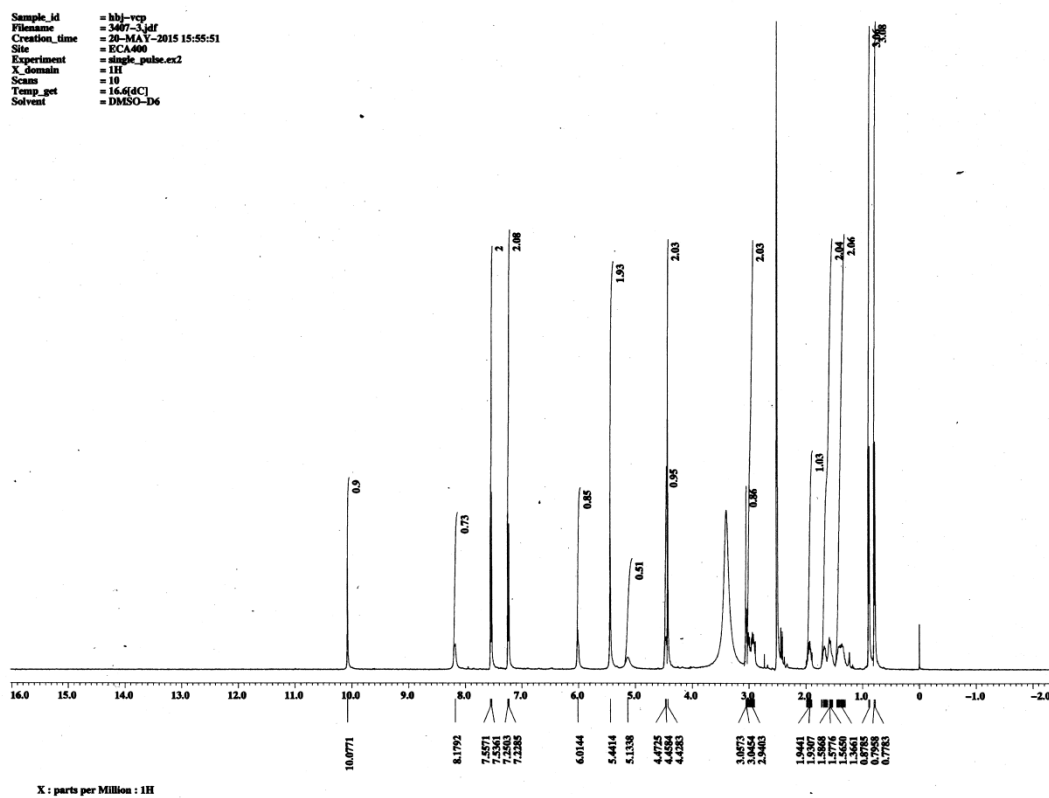

Figure S20. The <sup>1</sup>H-NMR spectrum of compound 9b.

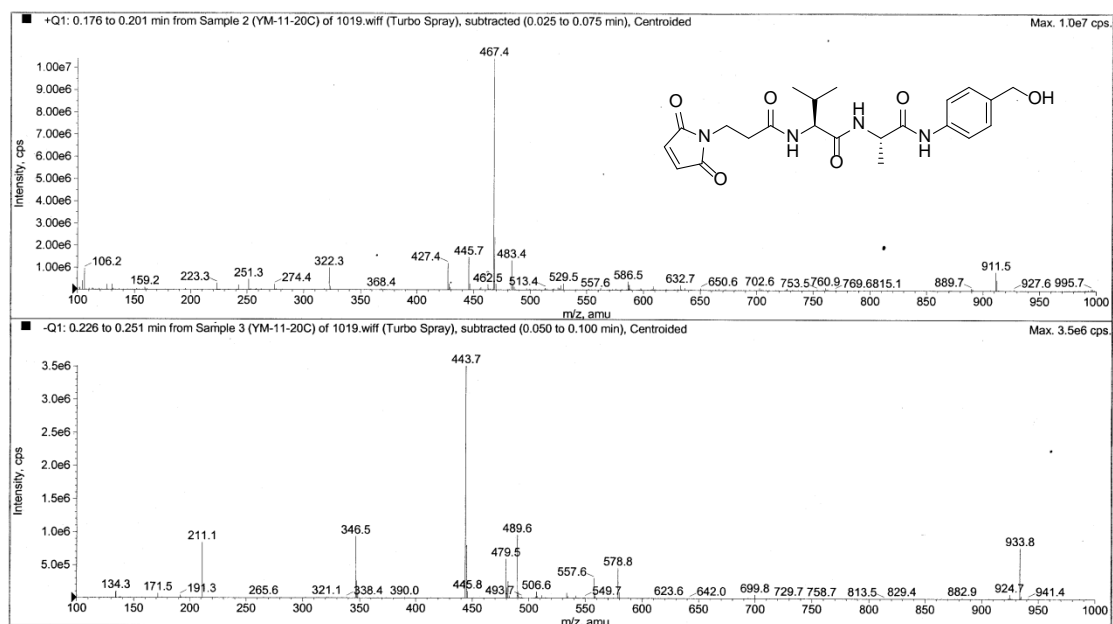

Figure S21. The ESI-MS spectrum of compound *10a*.

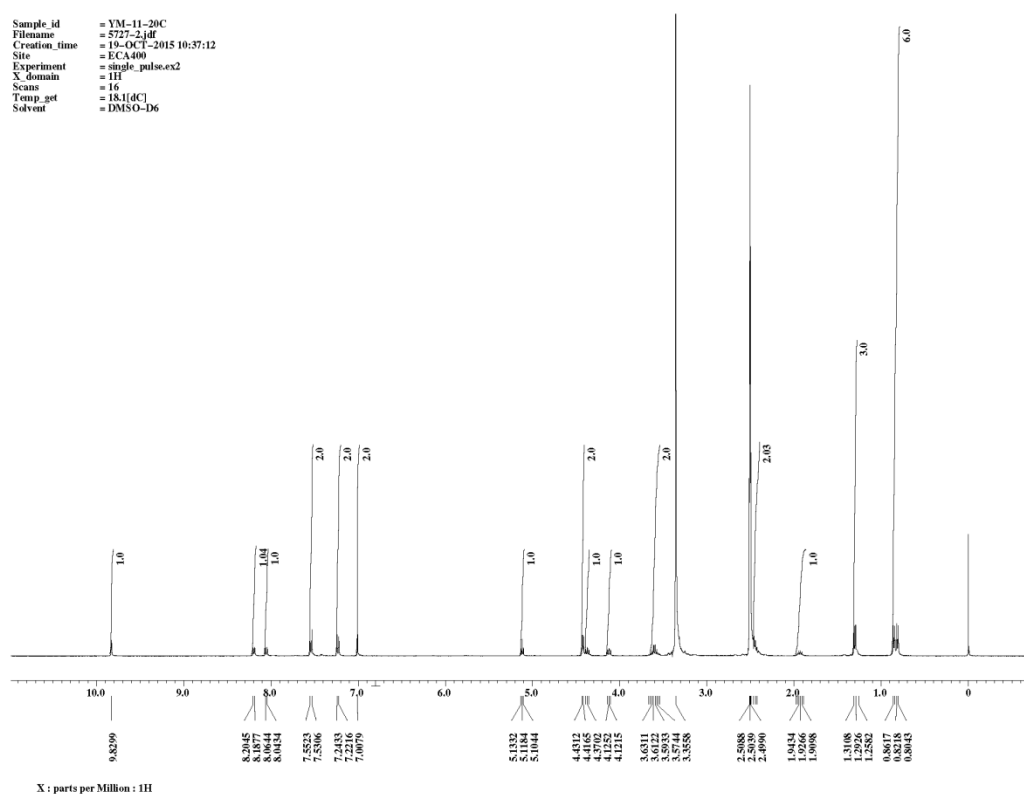

Figure S22. The  $^1\text{H}$ -NMR spectrum of compound *10a*.

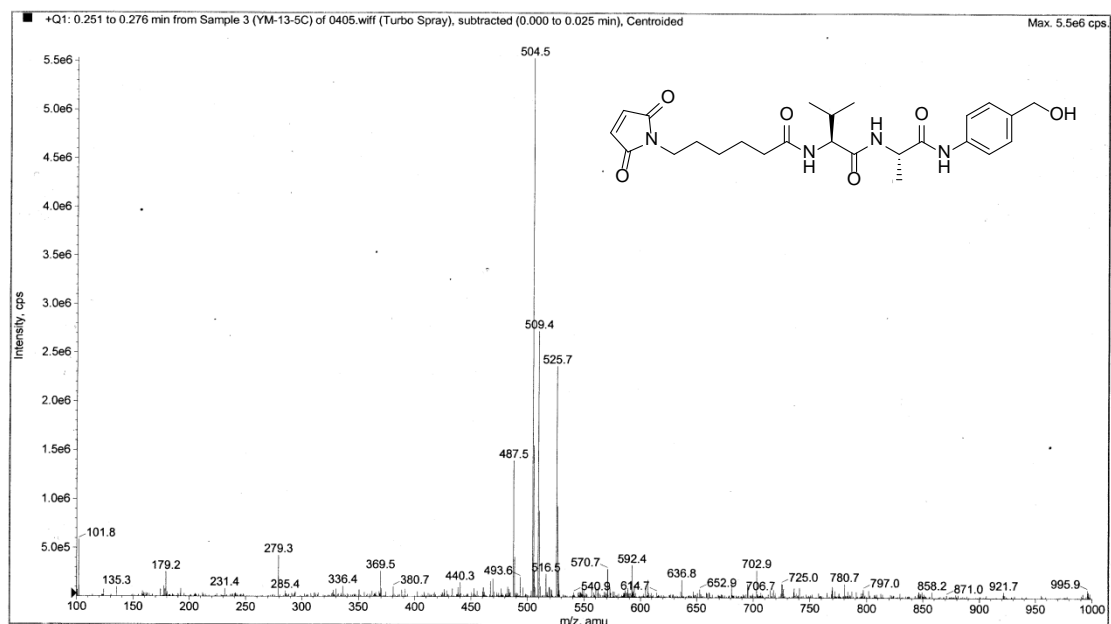

Figure S23. The ESI-MS spectrum of compound 10b.

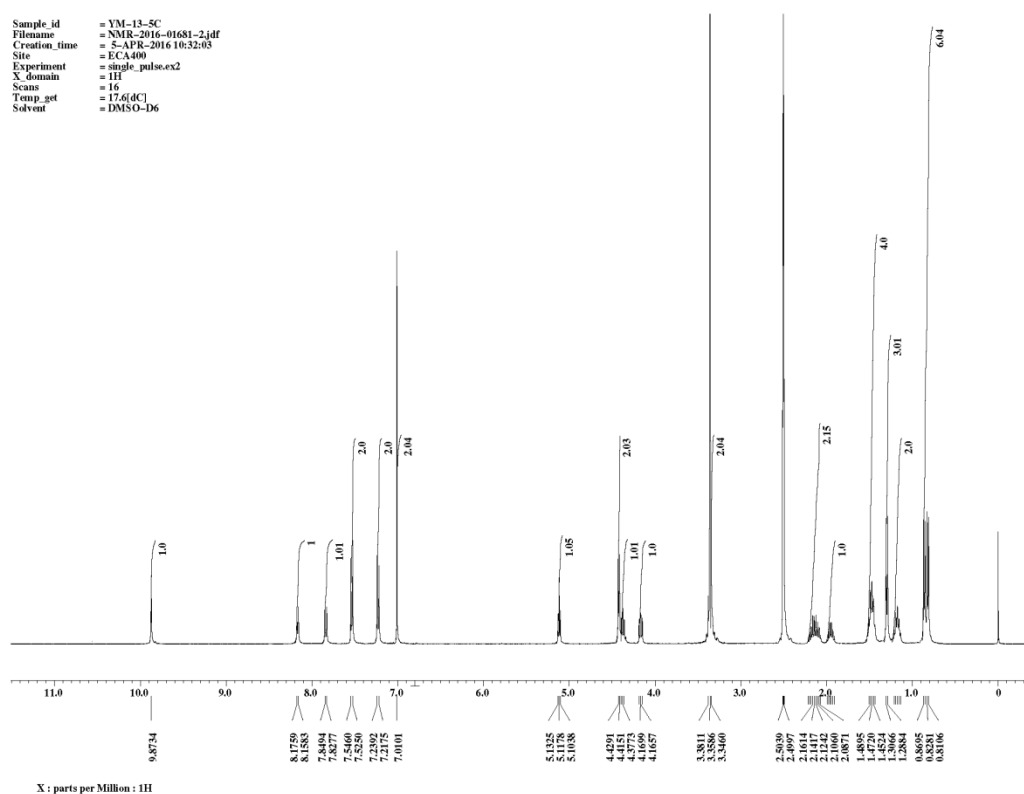

Figure S24. The <sup>1</sup>H-NMR spectrum of compound 10b.

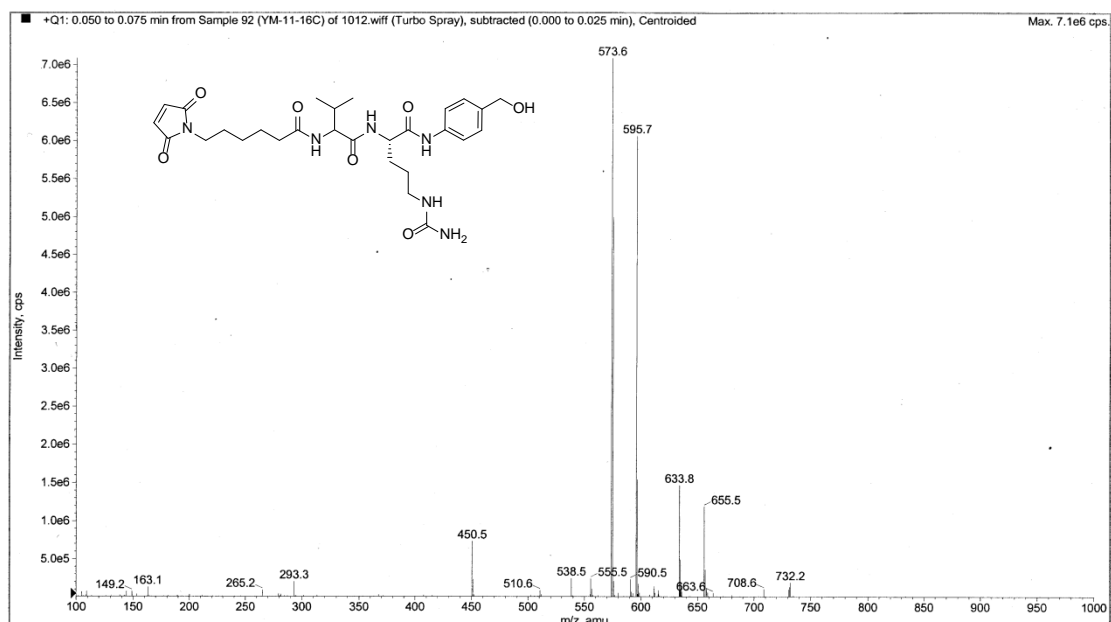

Figure S25. The ESI-MS spectrum of compound 10c.

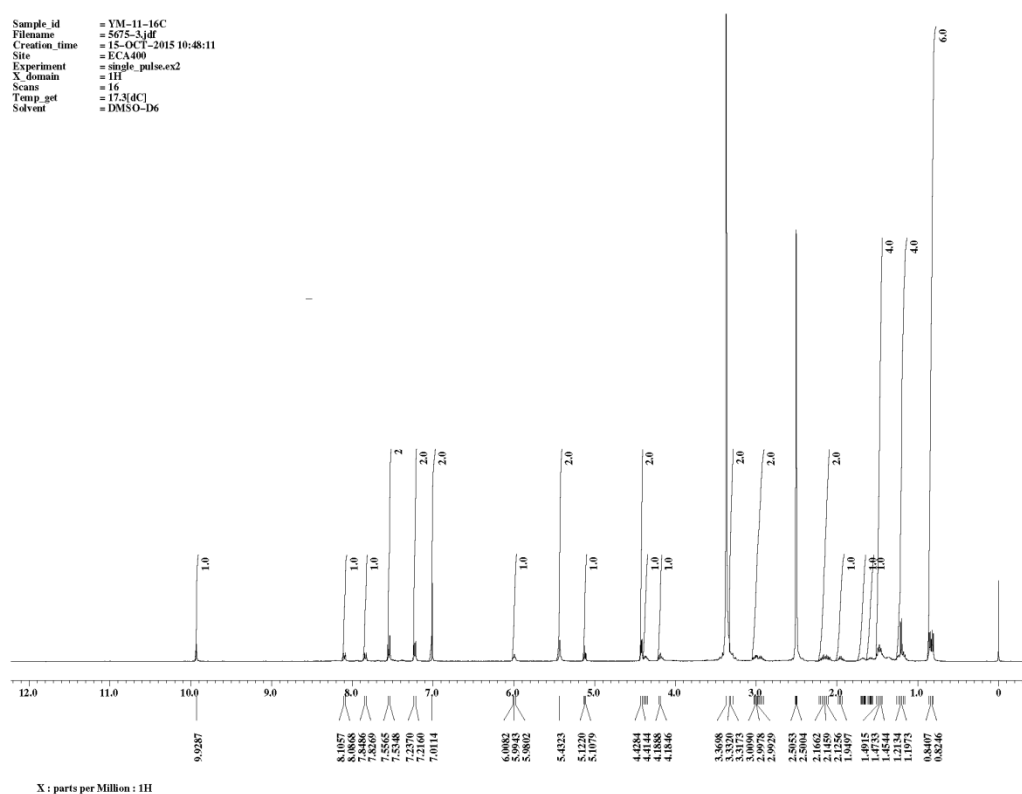

Figure S26. The <sup>1</sup>H-NMR spectrum of compound 10c.

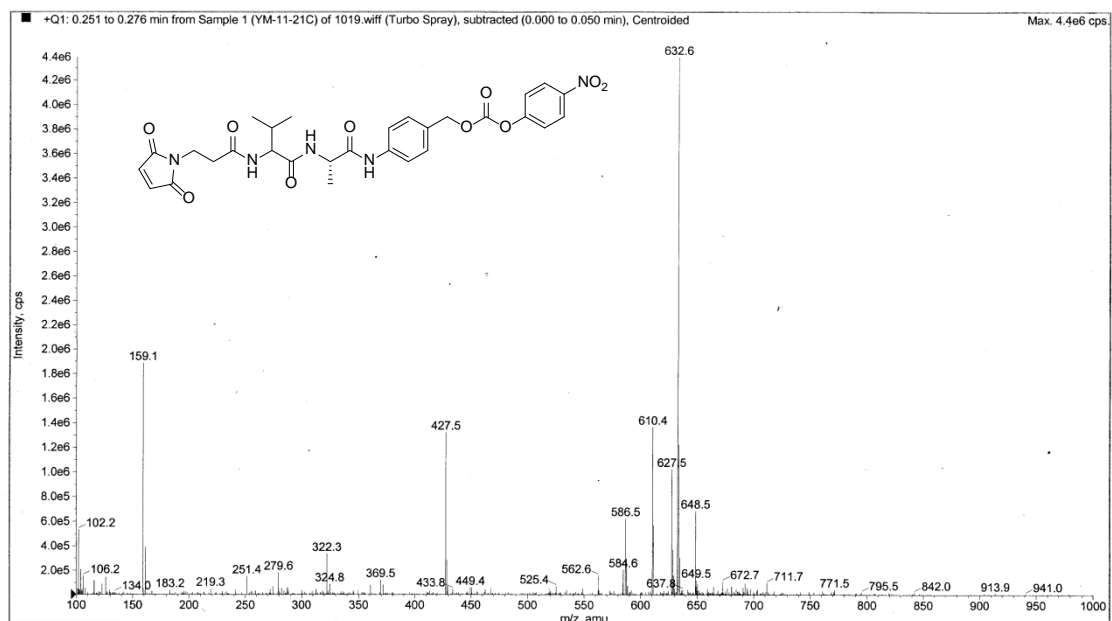

Figure S27. The ESI-MS spectrum of compound 11a.

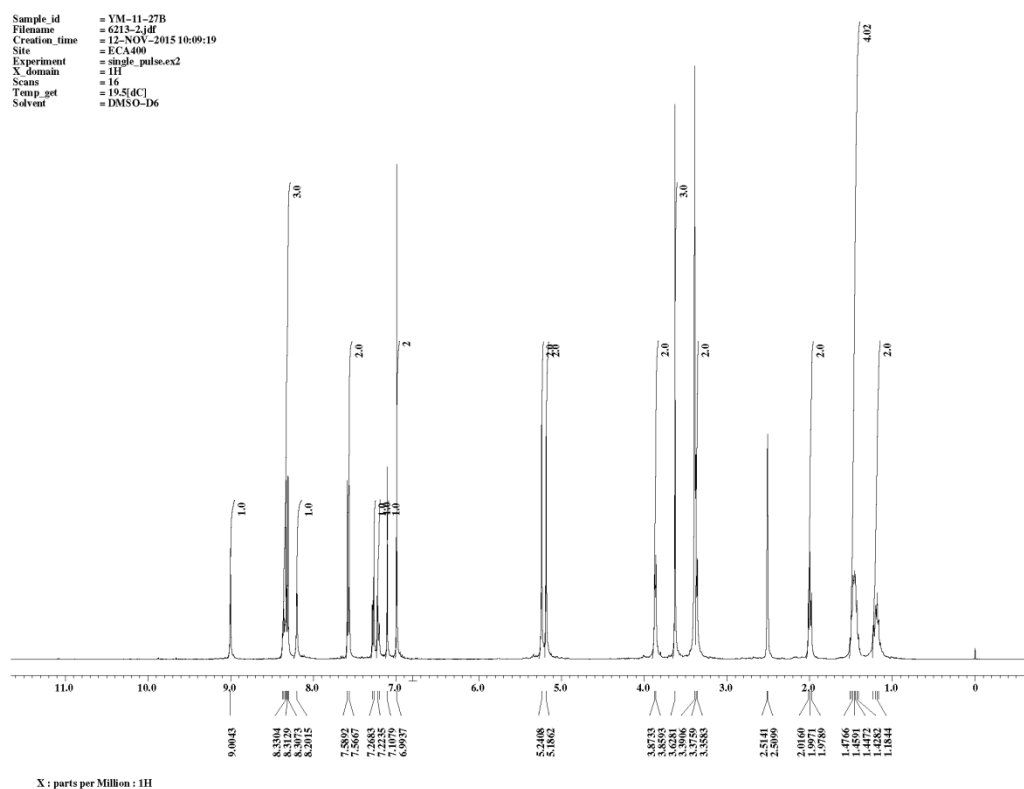

Figure S28. The <sup>1</sup>H-NMR spectrum of compound 11a.

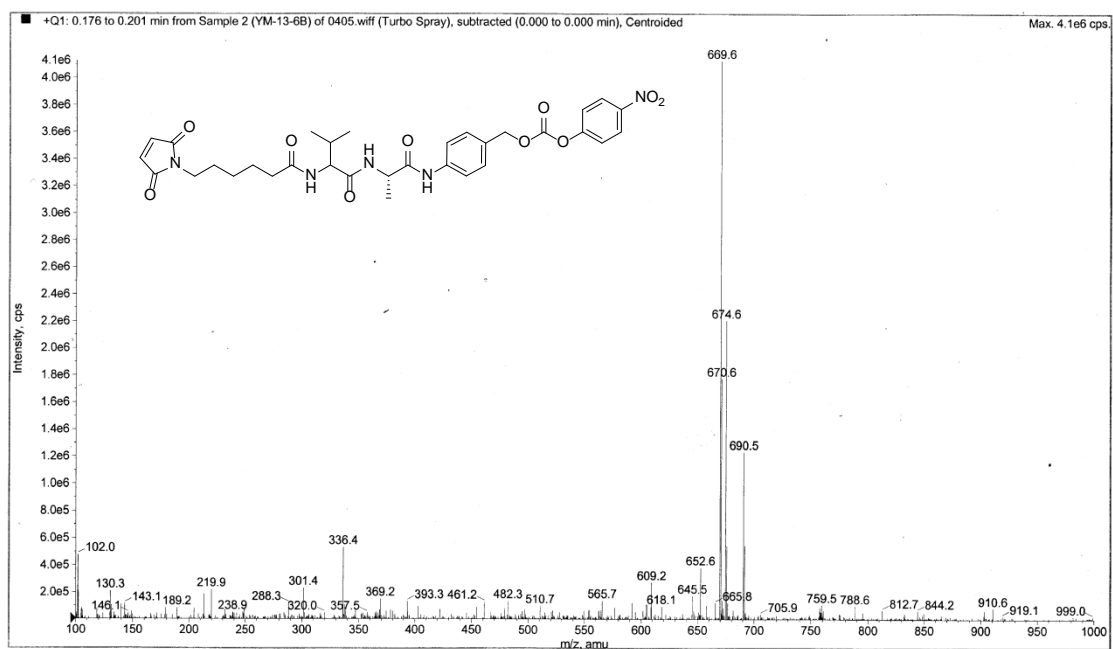

Figure S29. The ESI-MS spectrum of compound 11b.

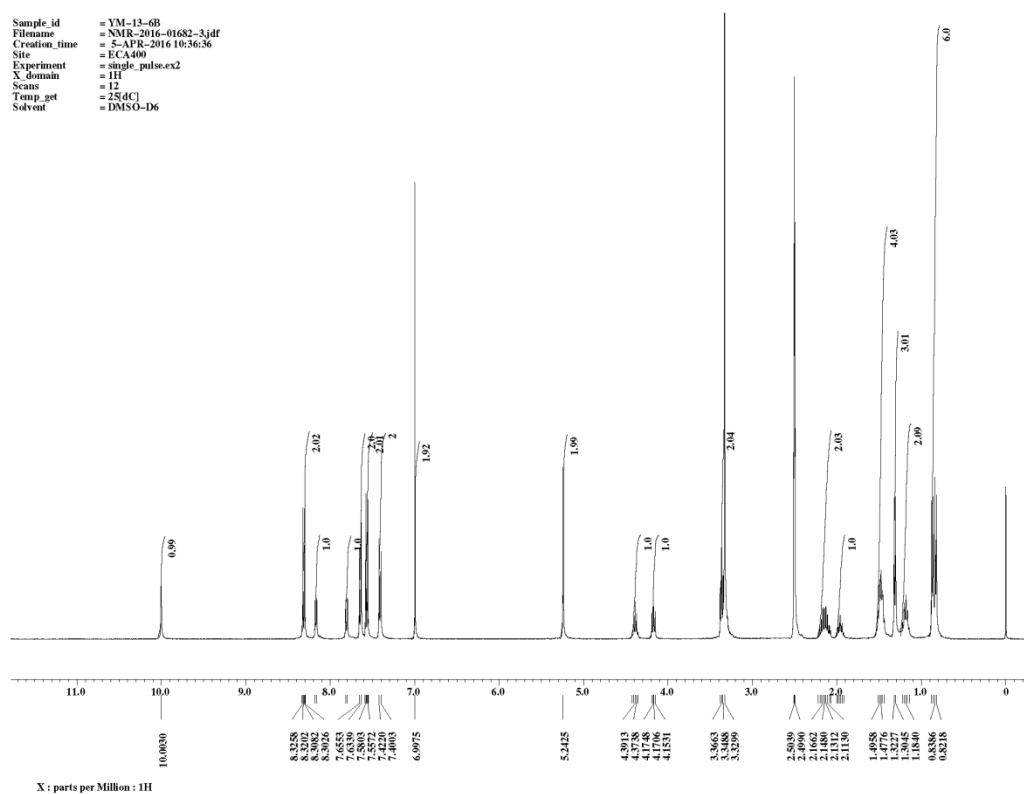

Figure S30. The <sup>1</sup>H-NMR spectrum of compound 11b.

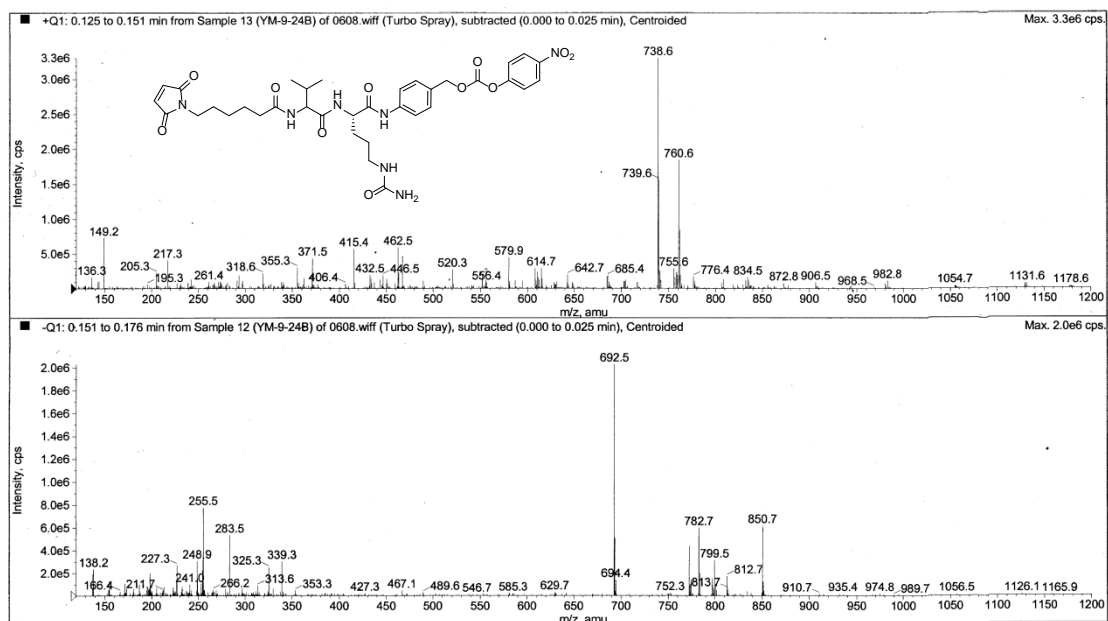

Figure S31. The ESI-MS spectrum of compound *11c*.

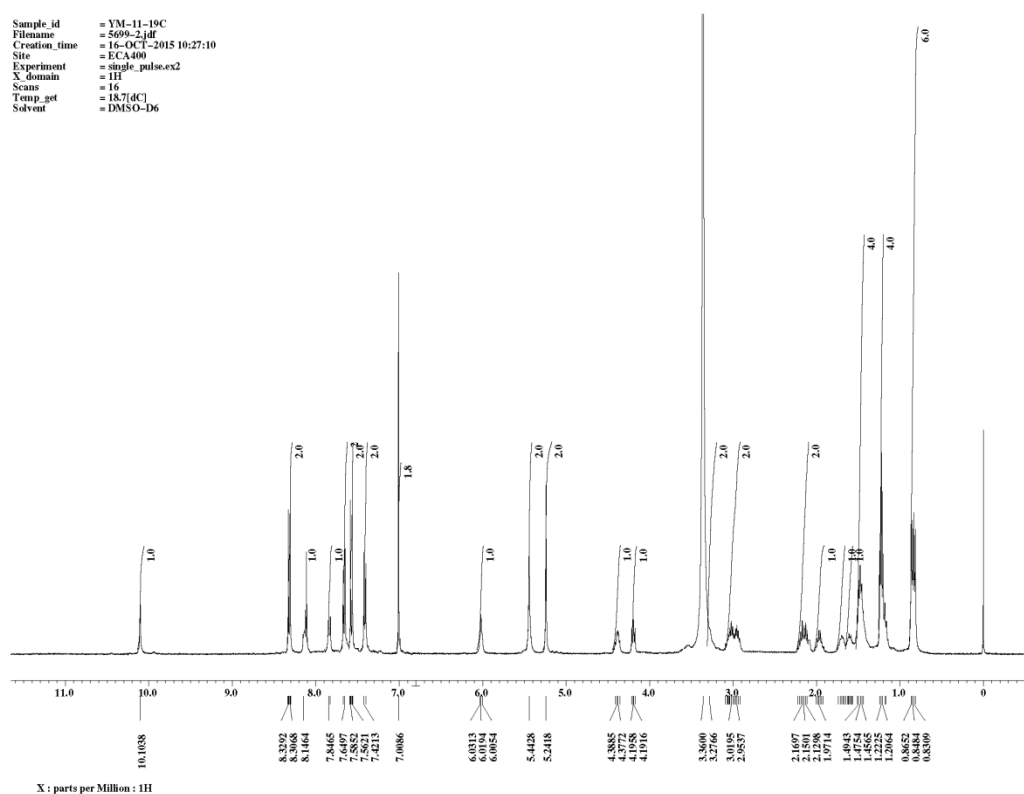

Figure S32. The  $^1\text{H}$ -NMR spectrum of compound *11c*.



Data Filename O639.d  
Instrument Name TOF G6230A  
Acq Method YCL.M  
IRM Calibration Status Success  
User Chromatograms

Sample Name YM-11-24  
Acquired Time 2017-02-10  
Acquired SW 6200 series TOF/6500 series

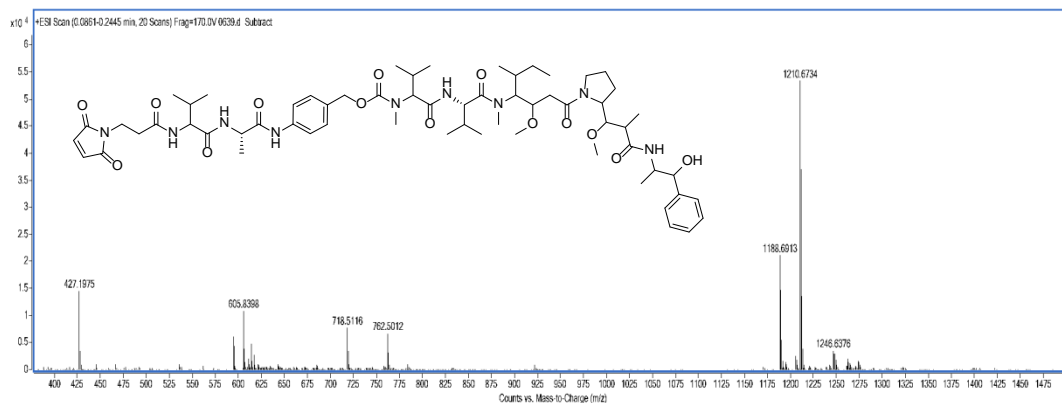

Figure S33. The ESI-MS spectrum of compound 12a.

Sample\_id = ym-11-24  
Filename = NMR-2017-01458-4.jdf  
Creation\_time = 10-FEB-2017 10:49:01  
Site = ECA400  
Experiment = single\_pulse.ex2  
X\_domain = 1H  
Scans = 16  
Temp\_set = 17.2(dC)  
Solvent = DMSO-D6

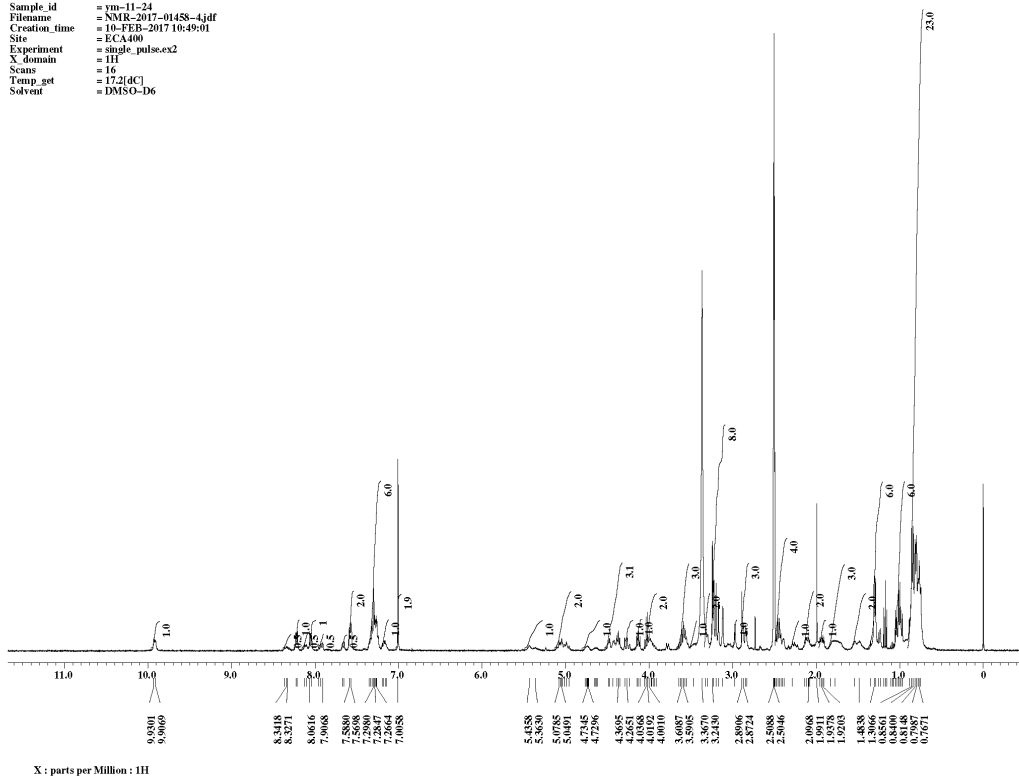

Figure S34. The <sup>1</sup>H-NMR spectrum of compound 12a.

Data Filename 0640.d  
Instrument Name TOF G6230A  
Acq Method YCL.M  
IRM Calibration Status Success  
User Chromatograms

Sample Name YM-13-7  
Acquired Time 2017-02-10  
Acquired SW 6200 series TOF/6500 series

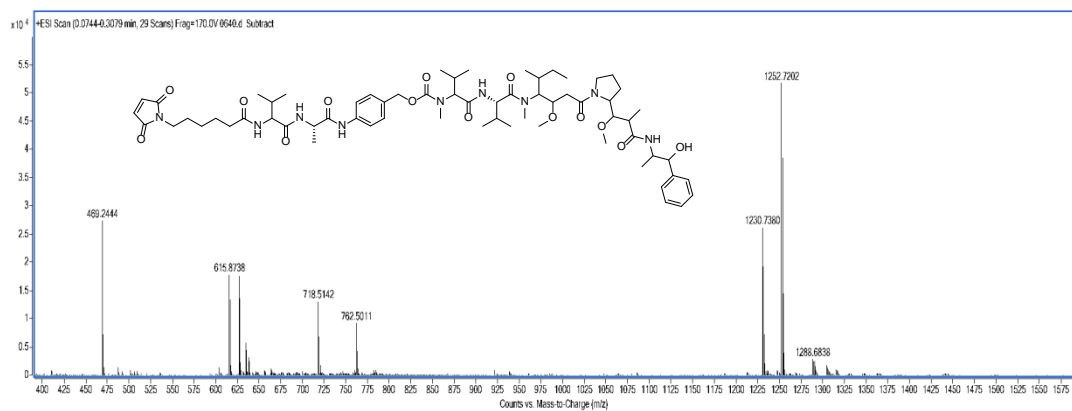

Figure S35. The ESI-MS spectrum of compound *12b*.

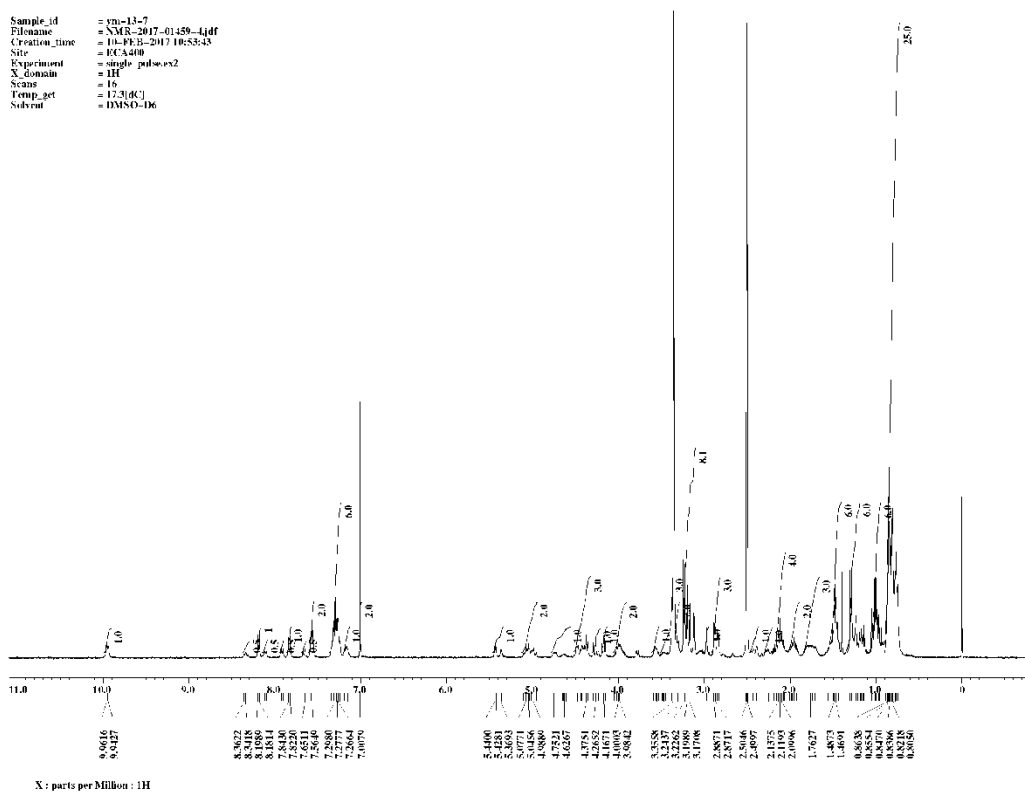

Figure S36. The  $^1\text{H}$ -NMR spectrum of compound *12b*.

Data Filename 0642.d  
Instrument Name TOF G6230A  
Acq Method YCLM  
IRM Calibration Status Success  
User Chromatograms

Sample Name YM-12-50  
Acquired Time 2017-02-10  
Acquired SW 6200 series TOF/6500 series

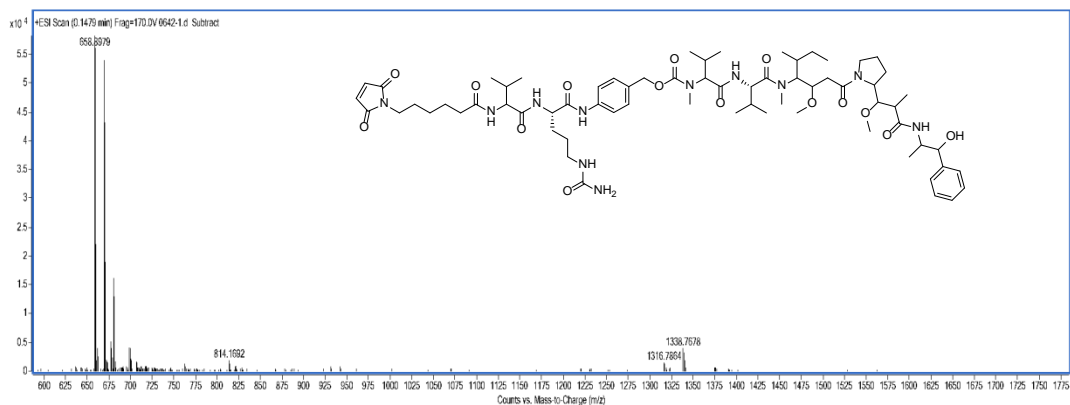

Figure S37. The ESI-MS spectrum of compound 12c.

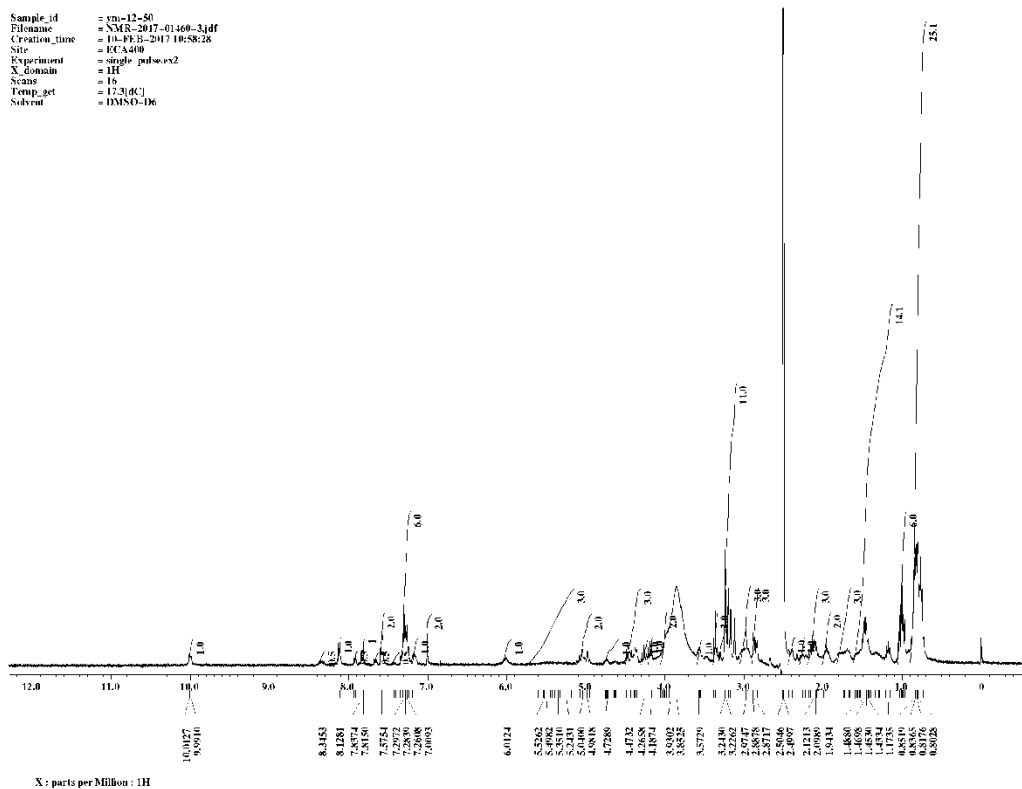

Figure S38. The <sup>1</sup>H-NMR spectrum of compound 12c.
